# Supplementary material for: Pyrrolizidine alkaloids quantified in soil and water using UPLC-MS/MS
Source: Royal Society of Chemistry journal article supplement (doi:10.1039/c9ra05301h), 2019-01-01
Supplement: c9ra05301h1.pdf [file c9ra05301h1.pdf]

## **Electronic supplementary information**

### **Pyrrolizidine Alkaloids Quantified in Soil and Water using UPLC-MS/MS**

Jawameer R. Hama, Bjarne W. Strobel

Department of Plant and Environmental Sciences, University of Copenhagen, Thorvaldsensvej 40, 1871  
Frederiksberg, Denmark

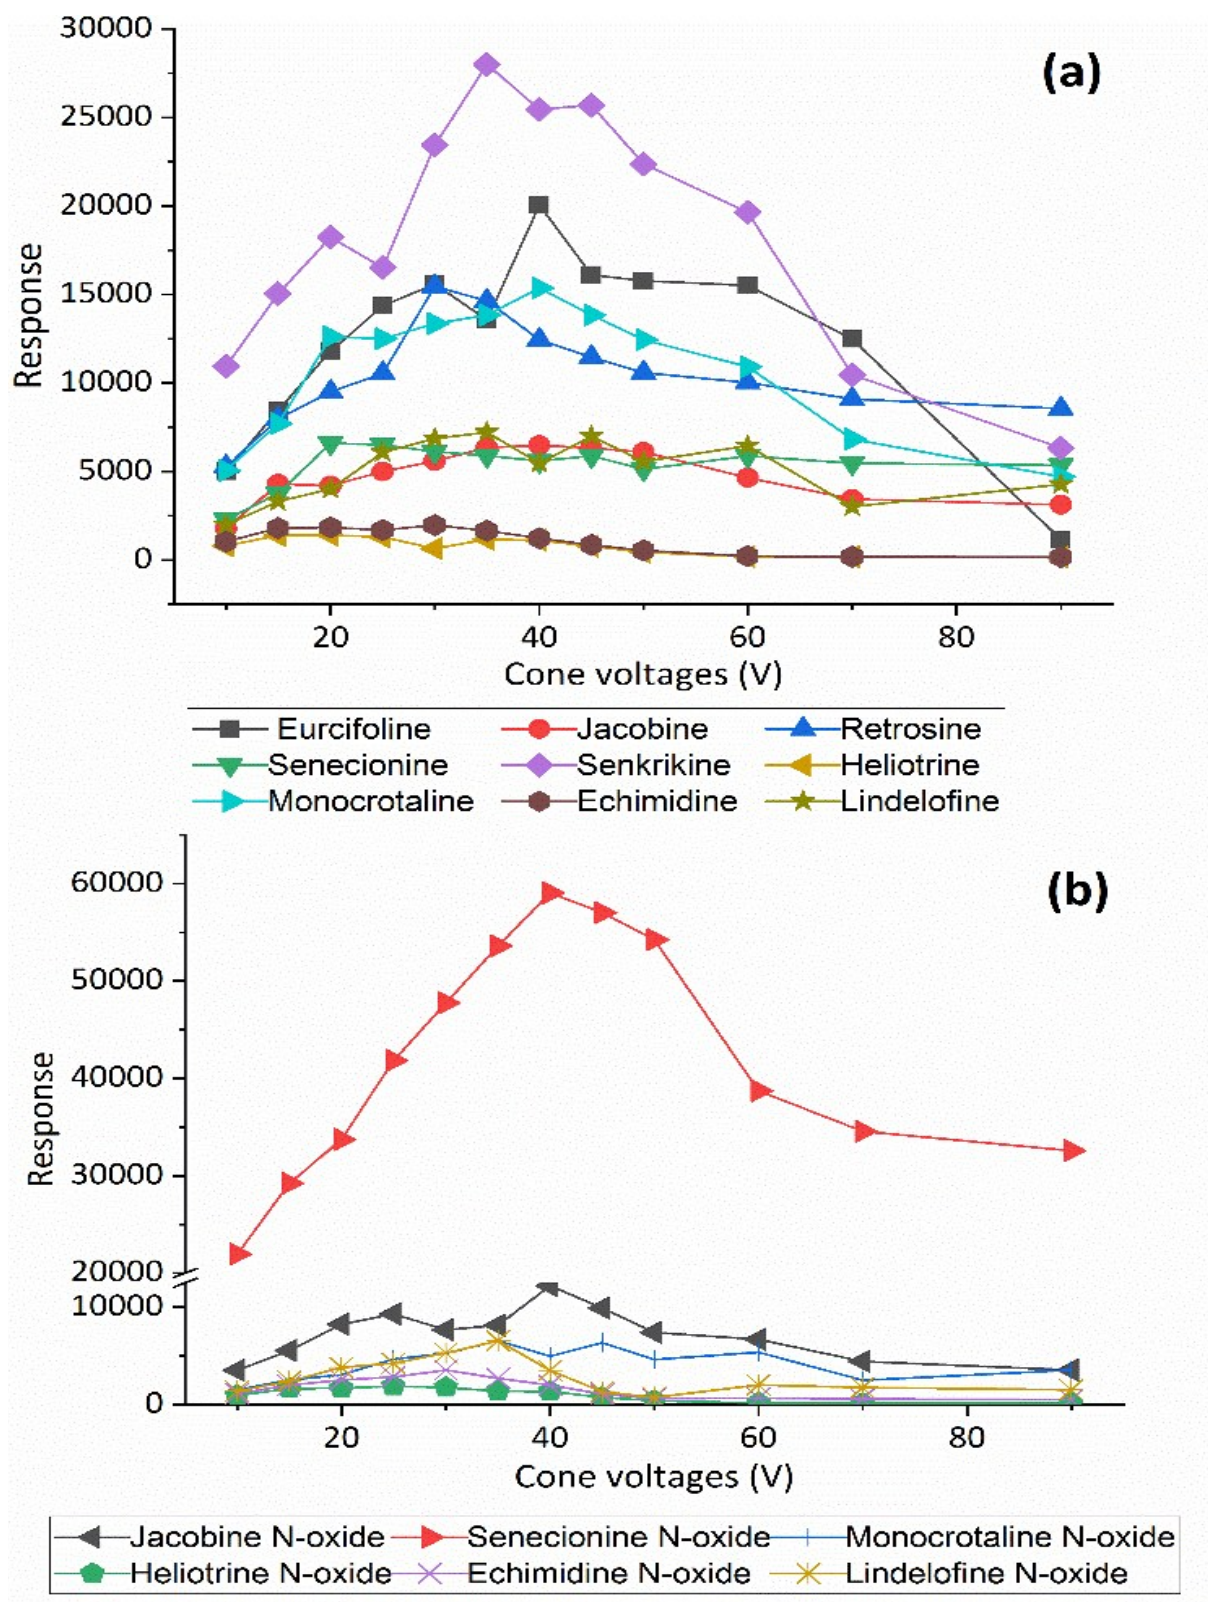

Fig. S1. The effect of different cone voltages, 10-90 V on the instrument response for (a) free PAs and (b) PANOs.

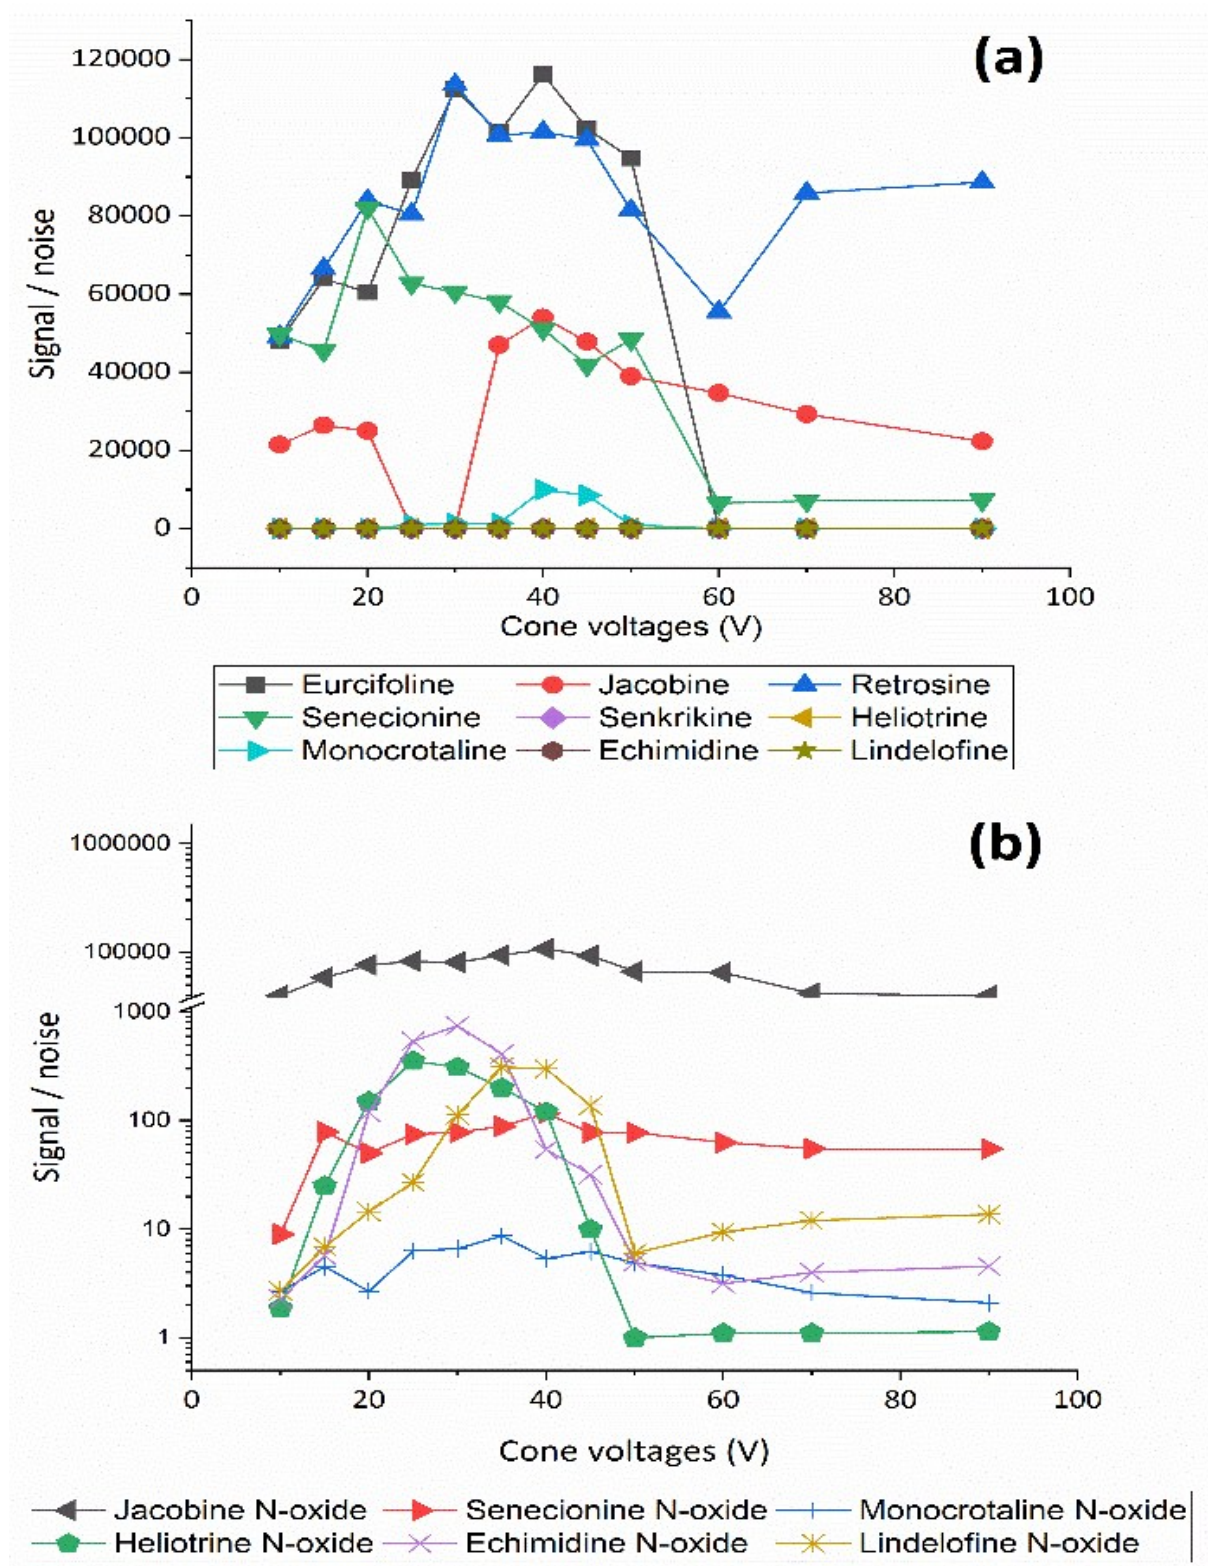

Fig. S2. The effect of different cone voltages, 10-90 V on the signal/noise ration for (a) free PAs and (b) PANOs.



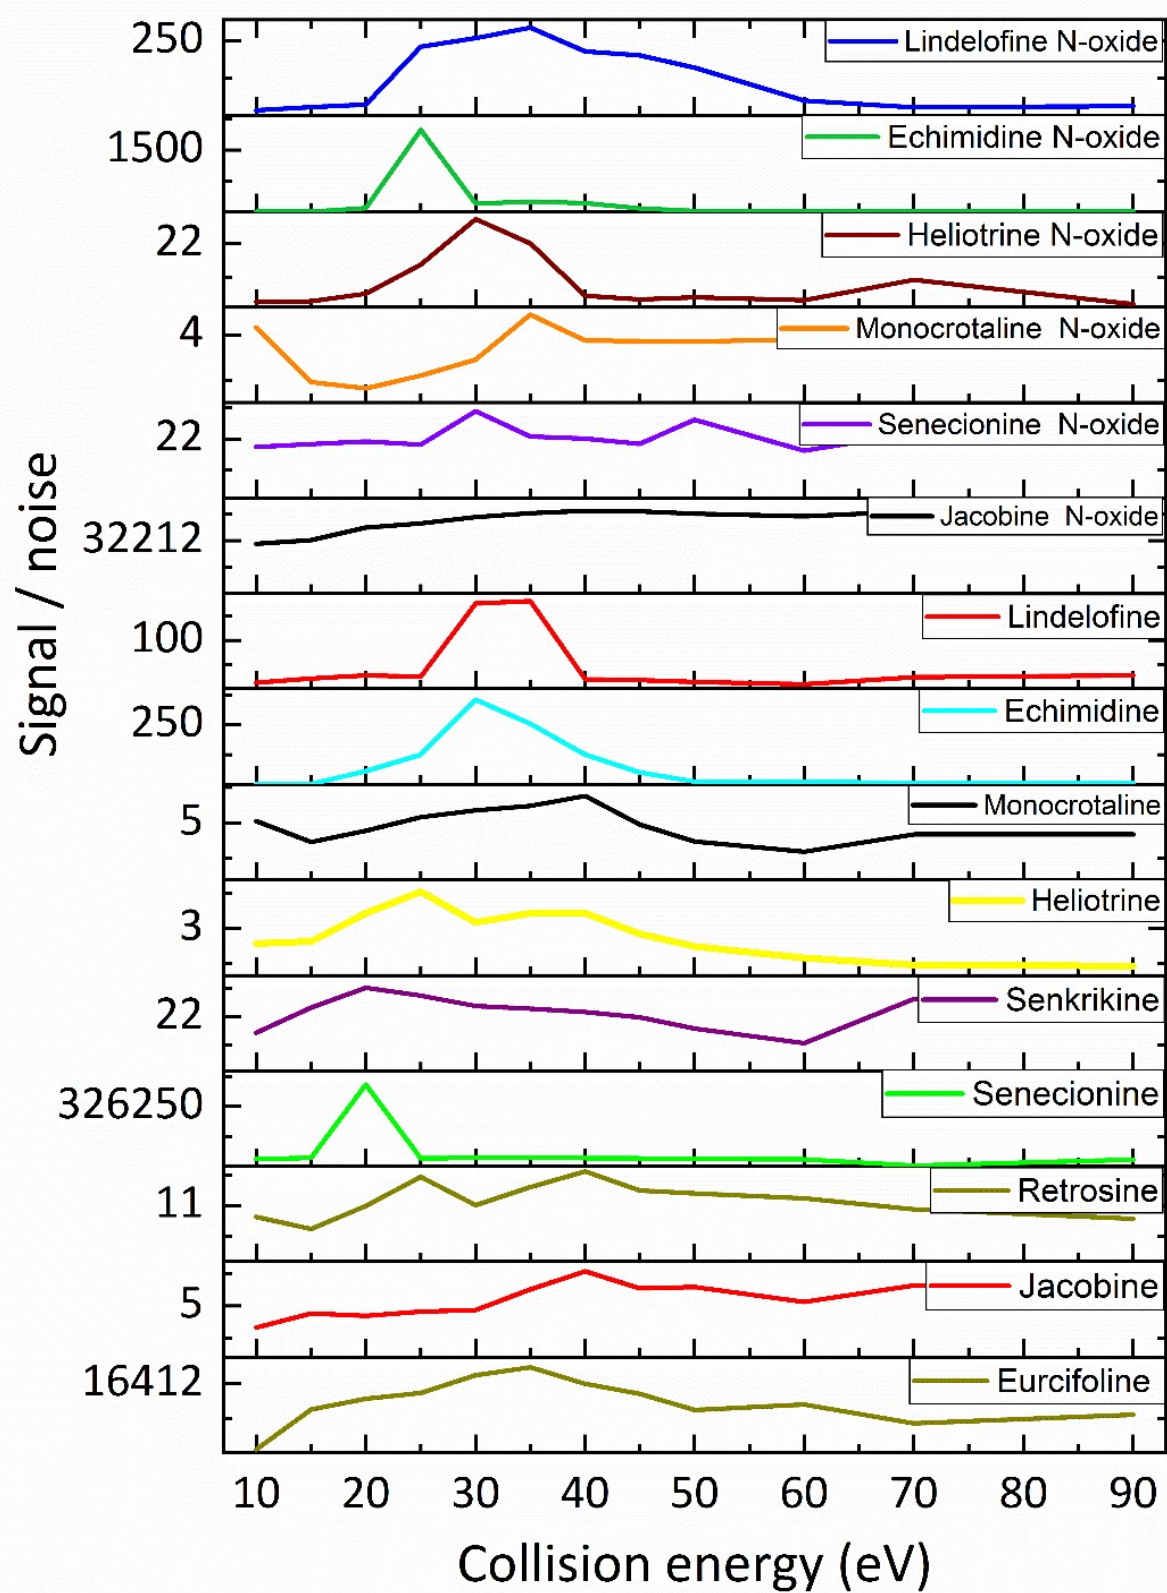

Fig. S3. The effect of different collision energies 10-90 eV on signal to noise for selected PAs.

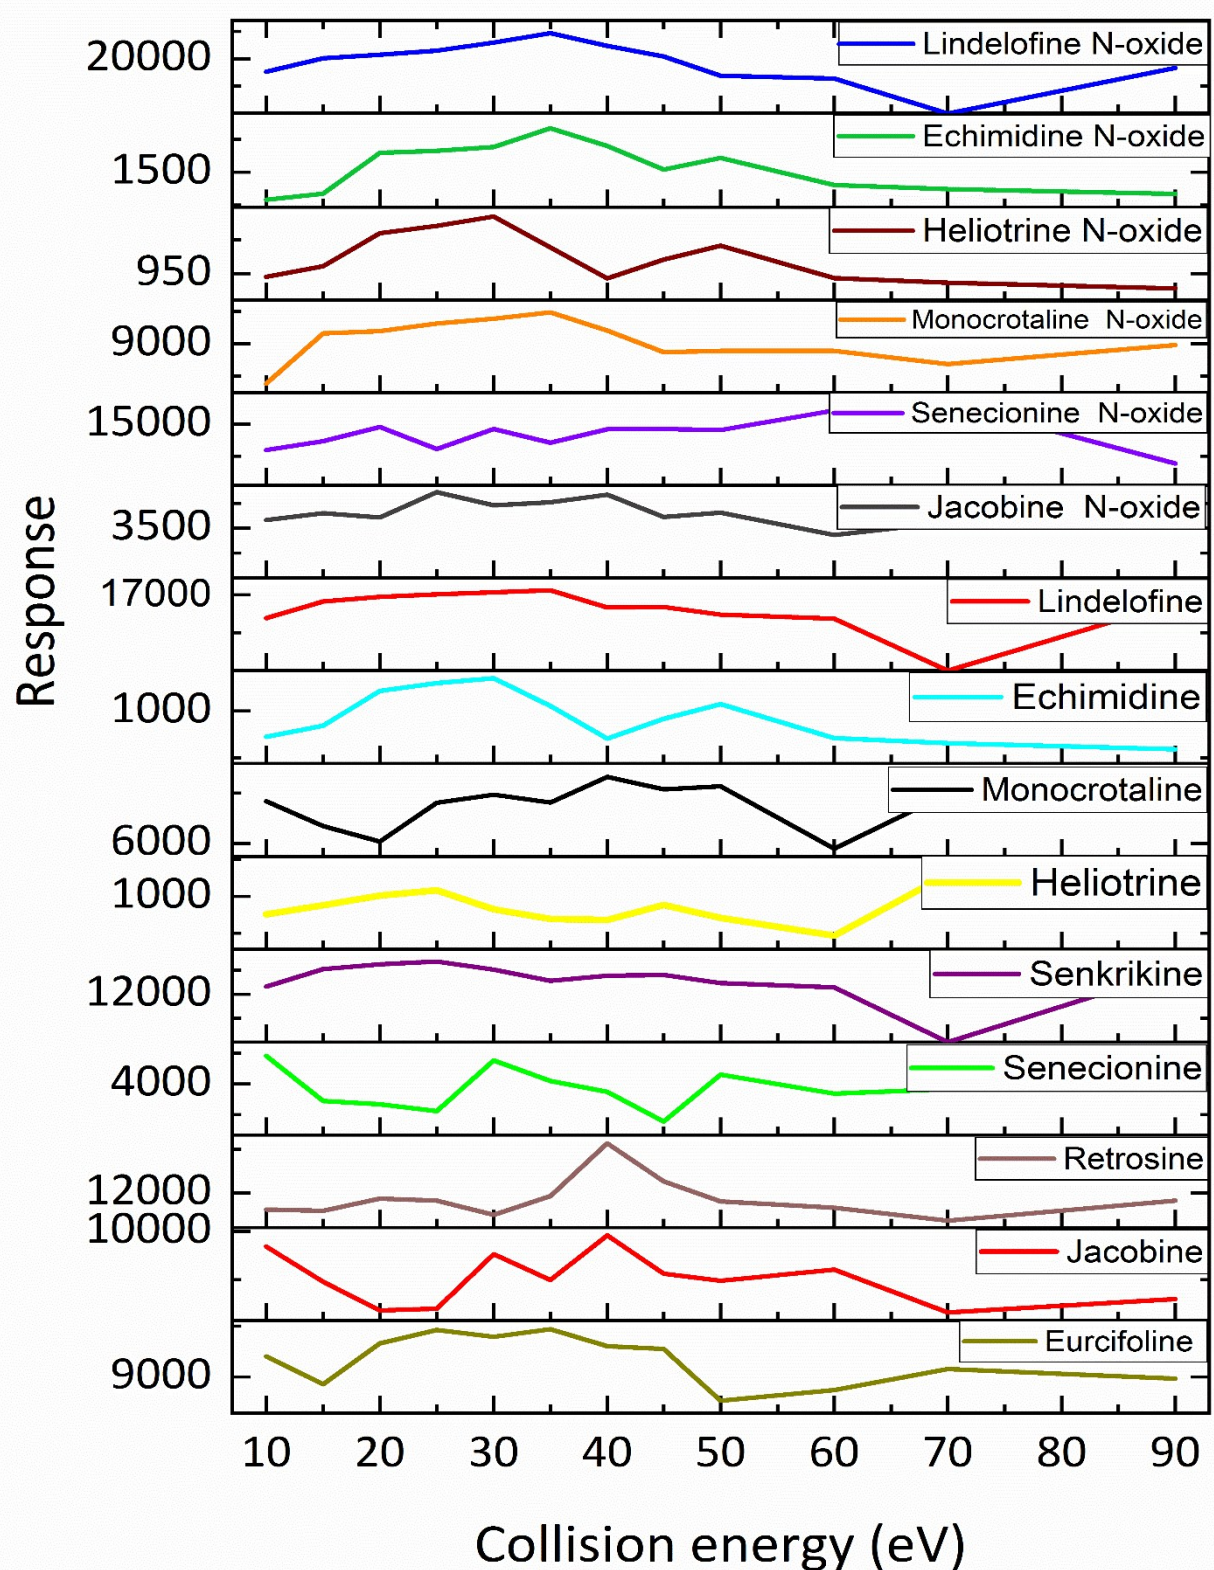

Fig. S4. The effect of different collision energies 10-90 eV on the instrument response for selected PAs.
